# Supplementary material for: Machine Learning Detects Pattern of Differences in Functional Magnetic Resonance Imaging (fMRI) Data between Chronic Fatigue Syndrome (CFS) and Gulf War Illness (GWI)
Source: MDPI journal article supplement (doi:10.3390/brainsci10070456), 2020-07-17
Supplement: s1 [file s1]

# Supplementary Material: Machine Learning Detects Pattern of Differences in Functional Magnetic Resonance Imaging (fMRI) Data between Chronic Fatigue Syndrome (CFS) and Gulf War Illness (GWI)

Destie Provenzano <sup>1,2</sup>, Stuart D. Washington <sup>1</sup>, Yuan J. Rao <sup>3</sup>, Murray Loew <sup>2</sup> and James Baraniuk <sup>1,\*</sup>

**Table S1:** Comparison of all regions from this analysis and our two prior analysis as referenced in Provenzano et al (2020)

| Abbreviation       | CFS vs GWI<br>Day 1 | CFS vs GWI<br>Day 2 | GWI vs SC<br>Day 1 | GWI vs SC<br>Day 2 | CFS vs SC<br>Day 1 | CFS vs SC<br>Day 2 |
|--------------------|---------------------|---------------------|--------------------|--------------------|--------------------|--------------------|
| Frontal_Sup_Orb_R  | -0.59               | -0.1                | 0.0627             | 0.0245             |                    | -0.039             |
| Frontal_Mid_Orb_L  | -0.44               |                     | 0.2989             |                    | 0.193              |                    |
| Cingulum_Mid_R     | -0.28               |                     |                    |                    |                    |                    |
| Occipital_Mid_R    | -0.23               |                     | -0.0461            |                    | -0.262             |                    |
| Frontal_Inf_Oper_L | -0.08               |                     |                    |                    |                    |                    |
| SupraMarginal_L    | -0.07               |                     | 0.1442             | 0.0213             | 0.294              | -0.008             |
| Occipital_Mid_L    | -0.07               | -0.1                |                    |                    |                    | 0.203              |
| Precuneus_R        | -0.05               | 0.04                |                    |                    |                    | 0.107              |
| Fusiform_R         | -0.04               |                     |                    |                    | 0.269              |                    |
| Frontal_Inf_Tri_R  | -0.02               | -0.2                |                    |                    |                    | -0.148             |
| Parietal_Sup_R     | -0.02               | -0.06               |                    |                    |                    |                    |
| Frontal_Mid_R      | -0.02               | -0.02               |                    |                    |                    |                    |
| Frontal_Inf_Orb_R  | -0.02               |                     |                    |                    |                    |                    |
| Parietal_Inf_L     | -0.01               | -0.06               |                    |                    |                    |                    |
| Precuneus_L        | 0.01                | -0.13               |                    |                    |                    | -0.172             |
| Temporal_Inf_R     | 0.03                | 0.07                |                    |                    |                    |                    |
| Parietal_Sup_L     | 0.04                | -0.09               |                    |                    |                    |                    |
| Frontal_Mid_L      | 0.04                | 0.06                |                    |                    |                    |                    |
| Frontal_Sup_R      | 0.05                | 0.16                |                    |                    | 0.107              |                    |
| Frontal_Sup_L      | 0.06                |                     | -0.0646            |                    | -0.117             |                    |
| Angular_R          | 0.08                | 0.04                | 0.0399             |                    |                    |                    |
| Insula_R           | 0.13                | 0.26                | -0.0368            | -0.0131            |                    |                    |
| Postcentral_R      | 0.13                | 0.21                |                    | -0.0247            | -0.379             | -0.161             |
| Rolandic_Oper_R    | 0.14                |                     |                    |                    | 0.534              |                    |

|                      |      |       |         |         |        |        |
|----------------------|------|-------|---------|---------|--------|--------|
| Cingulum_Mid_L       | 0.15 |       |         | 0.0945  |        |        |
| Frontal_Mid_Orb_R    | 0.18 | -0.08 | -0.0168 | 0.0382  | -0.262 |        |
| Putamen_L            | 0.81 | -0.08 |         |         | -0.375 | 0.065  |
| Calcarine_R          |      |       | -0.805  | -0.0535 |        | 0.122  |
| Paracentral_Lobule_R |      |       | -0.4414 | -0.2976 |        |        |
| Cerebellum_8_L       |      |       | -0.4121 |         |        |        |
| Lingual_R            |      |       | -0.3924 |         | -0.292 |        |
| Rectus_R             |      |       | -0.366  |         | -0.081 |        |
| Temporal_Pole_Sup_R  |      |       | -0.3209 | 0.2698  |        |        |
| Cerebellum_Crus2_R   |      |       | -0.2809 |         |        |        |
| Thalamus_R           |      |       | -0.1715 | 0.0304  |        |        |
| Postcentral_L        |      | 0.23  | -0.1314 |         |        | 0.071  |
| Cuneus_R             |      |       | -0.1037 |         | 0.566  |        |
| Frontal_Inf_Oper_R   |      |       | -0.052  |         |        | 0.139  |
| Supp_Motor_Area_R    |      |       | -0.0422 |         | -0.145 |        |
| Cerebellum_Crus1_L   |      |       | -0.0297 | -0.0707 |        |        |
| Cerebellum_6_R       |      |       | 0.0264  |         |        |        |
| Temporal_Pole_Sup_L  |      |       | 0.038   | -0.0213 | -0.128 | -0.427 |
| Cuneus_L             |      |       | 0.046   |         |        |        |
| Frontal_Inf_Tri_L    |      |       | 0.0494  |         |        |        |
| Precentral_R         |      | -0.08 | 0.1018  |         |        |        |
| Temporal_Sup_L       |      |       | 0.5282  |         |        |        |
| Cerebellum_7b_L      |      |       | 0.5321  |         |        |        |
| Calcarine_L          |      |       | 0.7595  |         |        | -0.134 |
| Putamen_R            |      |       |         |         | -0.449 | 0.01   |
| Vermis_6             |      |       |         |         | -0.374 |        |
| Cerebellum_6_L       |      |       |         |         | -0.278 |        |
| Paracentral_Lobule_L |      |       |         |         | -0.176 |        |
| Temporal_Mid_R       |      |       |         |         | -0.106 | -0.153 |
| Caudate_R            |      |       |         |         | 0.054  | 0.01   |
| ParaHippocampal_R    |      |       |         |         | 0.092  | 0.015  |
| Cerebellum_8_R       |      |       |         | -0.0562 | 0.115  | -0.028 |
| Frontal_Inf_Orb_L    |      | 0.3   |         |         | 0.142  | 0.214  |
| SupraMarginal_R      |      |       |         |         | 0.206  |        |

|                      |       |         |       |        |
|----------------------|-------|---------|-------|--------|
| Occipital_Sup_L      |       |         | 0.29  |        |
| Frontal_Sup_Medial_R | -0.59 | 0.0653  | 0.303 |        |
| Cerebellum_4_5_L     |       | 0.7197  | 0.34  |        |
| Rolandic_Oper_L      | -0.23 | 0.0205  |       | 0.542  |
| Fusiform_L           | -0.11 |         |       |        |
| Precentral_L         | -0.09 |         |       |        |
| Cingulum_Ant_L       | -0.03 |         |       |        |
| Parietal_Inf_R       | -0.02 |         |       |        |
| Temporal_Mid_L       | 0.07  |         |       | 0.091  |
| Thalamus_L           | 0.08  | -0.2715 |       |        |
| Supp_Motor_Area_L    | 0.12  |         |       |        |
| Vermis_3             |       | -0.7653 |       |        |
| Olfactory_R          |       | -0.4417 |       |        |
| Temporal_Pole_Mid_R  |       | -0.3901 |       |        |
| Cingulum_Ant_R       |       | -0.0409 |       |        |
| Frontal_Sup_Medial_L |       | -0.0385 |       |        |
| Occipital_Sup_R      |       | -0.0219 |       |        |
| Cerebellum_Crus1_R   |       | 0.0134  |       | 0.086  |
| Cerebellum_Crus2_L   |       | 0.0672  |       |        |
| Cerebellum_7b_R      |       | 0.1074  |       |        |
| Vermis_9             |       | 0.6321  |       |        |
| ParaHippocampal_L    |       | 0.9032  |       |        |
| Occipital_Inf_L      |       |         |       | -0.209 |
| Frontal_Med_Orb_R    |       |         |       | -0.178 |
| Pallidum_L           |       |         |       | -0.172 |
| Pallidum_R           |       |         |       | -0.062 |
| Cerebellum_9_L       |       |         |       | 0.095  |
| Temporal_Sup_R       |       |         |       | 0.252  |

**Table S2.** Abbreviations, terminology, and descriptions for various terms used throughout the paper. Definition is based on common knowledge or referenced in the manuscript.

| Abbreviations | Full Text                | Description                                                                                                                                                                                                               |
|---------------|--------------------------|---------------------------------------------------------------------------------------------------------------------------------------------------------------------------------------------------------------------------|
| CFS           | Chronic Fatigue Syndrome | Debilitating disorder characterized by chronic widespread pain, fatigue, sleep abnormalities, and cognitive impairment that are worsened by mild to moderate exertion (post-exertional malaise or exertional exhaustion). |
| GW            | Gulf War Illness         | Debilitating disorder characterized by chronic widespread pain, fatigue, sleep abnormalities, and cognitive impairment that are worsened by mild                                                                          |

|                  |                                           |                                                                                                                                                                 |
|------------------|-------------------------------------------|-----------------------------------------------------------------------------------------------------------------------------------------------------------------|
|                  |                                           | to moderate exertion (post-exertional malaise or exertional exhaustion. Experienced by 25 - 30% of veterans of the 1990 - 1991 Gulf War Conflict.               |
| KNN              | K Nearest Neighbors algorithm             | Characterizes all available classes and classifies new cases according to a similarity measure.                                                                 |
| SVM              | Linear SVM algorithm                      | Supervised learning algorithm that seeks to fit a plane to a series of data points.                                                                             |
| DT               | Decision Tree                             | Classification algorithm that functions like an "if-then" or flowchart type modeling tool where each node represents a respective classification of the data.   |
| RFE              | Random Forest                             | Random forest is multiple stacks of decision trees, or flowchart like nodes, to classify data with high accuracy.                                               |
| Adaboost         | AdaBoost algorithm                        | Boosting algorithm that combines multiple weak learners to create a stronger one.                                                                               |
| Naïve Bayes      | Naive Bayes Classifier                    | Probabilistic classifier that assumes dependence of the predictor variables on prior data.                                                                      |
| QDA              | Quadratic Discriminant Analysis algorithm | Quadratic classifier that is a variant of LDA to allow for non linear separation of data.                                                                       |
| Logistic         | Logistic Regression                       | A regression algorithm that fits a line to data according to the logistic function, or logit function where each coefficient represents the log odds.           |
| NN               | Neural Net                                | A classification tool capable of back propagation and self-updating of priors that uses multiple nodes and layers to create an accurate predictive capability.  |
| Ensemble Model   | Ensemble Model                            | A form of predictive algorithm or algorithms that typically uses multiple algorithms to generate a prediction.                                                  |
| Bucket of Models | Bucket of Models                          | An ensemble learning technique where multiple algorithms are used to select the best overall algorithm for a problem.                                           |
| Stacking         | Stacking                                  | Aggregate multiple weak models to obtain a better prediction                                                                                                    |
| Boosting         | Boosting                                  | Sequential training of weak learners to transition them to strong learners                                                                                      |
| RFE              | Recursive Feature Elimination             | Adds and removes new features until it determines the best local optimized model at that point in time.                                                         |
| Training Set     | Training, Model Build                     | Dataset used to build, or train, the model                                                                                                                      |
| Testing Set      | Test, Validation, Hold-out-Sample         | Dataset used to validate, or test, the model. Separate from the training sample. Does not overlap.                                                              |
| AAL              | Automated Anatomical Labeling Atlas       | A standardized brain atlas that seeks to align voxel data with respective coordinates in the MNI space.                                                         |
| MNI              | Montreal Neurological Institute           | A standardized space developed by the MNI institute that maps voxel data to relevant coordinates on the brain.                                                  |
| Voxel            | Voxel                                     | A three dimensional volume that is representative of a unit in an fMRI image. It is sized according to the parameters set by the user (2 mm x 2 mm x 2mm, etc.) |

|        |                                                        |                                                                                                                                                     |
|--------|--------------------------------------------------------|-----------------------------------------------------------------------------------------------------------------------------------------------------|
| BOLD   | Blood-oxygen-level-dependent imaging                   | Method used in fMRI to visualize areas of blood oxygenation, or activation, in the brain.                                                           |
| fMRI   | Functional magnetic resonance imaging                  | An imaging method that measures brain activity by detecting changes in blood flow.                                                                  |
| MPRAGE | Magnetization Prepared Rapid Acquisition Gradient Echo | A form of 3D structural brain imaging that allows one to visualize whole brain coverage in a short period of time.                                  |
| TR/TE  | Repetition Time/ Echo Time                             | Repetition time is the time between sequential pulses, where as time to echo or echo time is the time between the RF pulse and receipt of the echo. |
| FoV    | Field-of-View                                          | The field the image is fitted to.                                                                                                                   |
| EPI    | Echo-planar imaging                                    | Form of MRI imaging where multiple echoes of different phase steps are acquired.                                                                    |
| FWHM   | Full Width at Half Maximum                             | Form of measurement of a wave form that seeks to find the difference between the two extreme values of a variable equal to half its maximum value.  |

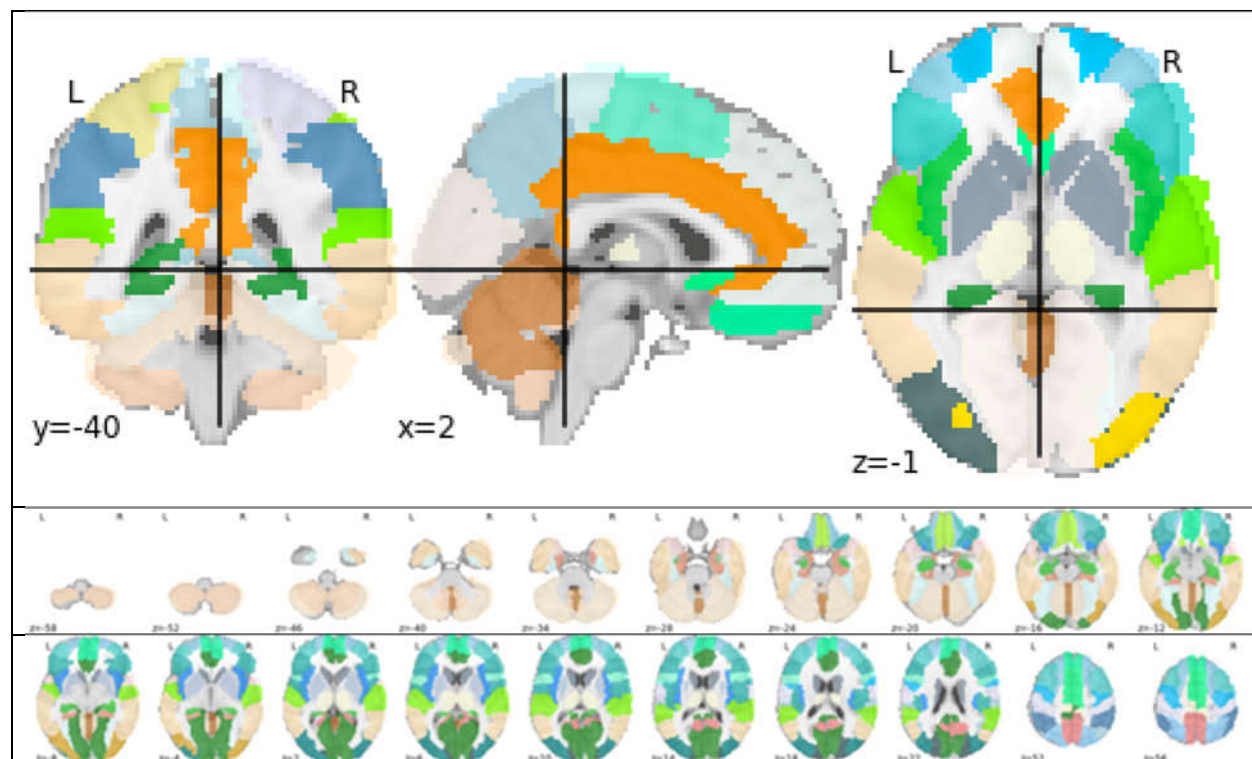

**Figure S1. AAL Atlas**

**Table S3: Atlas centers of mass (MNI coordinates) and voxels per region**

| Index | L R | Abbreviation | X   | Y  | Z  | Voxels |
|-------|-----|--------------|-----|----|----|--------|
| 1     | L   | Precentral_L | -39 | -6 | 51 | 3526   |

|    |   |                      |     |    |     |      |
|----|---|----------------------|-----|----|-----|------|
| 2  | R | Precentral_R         | 41  | -8 | 52  | 3381 |
| 3  | L | Frontal_Sup_L        | -18 | 35 | 42  | 3599 |
| 4  | R | Frontal_Sup_R        | 22  | 31 | 44  | 4056 |
| 5  | L | Frontal_Sup_Orb_L    | -17 | 47 | -13 | 963  |
| 6  | R | Frontal_Sup_Orb_R    | 18  | 48 | -14 | 997  |
| 7  | L | Frontal_Mid_L        | -33 | 33 | 35  | 4863 |
| 8  | R | Frontal_Mid_R        | 38  | 33 | 34  | 5104 |
| 9  | L | Frontal_Mid_Orb_L    | -31 | 50 | -10 | 888  |
| 10 | R | Frontal_Mid_Orb_R    | 33  | 53 | -11 | 1015 |
| 11 | L | Frontal_Inf_Oper_L   | -48 | 13 | 19  | 1038 |
| 12 | R | Frontal_Inf_Oper_R   | 50  | 15 | 21  | 1399 |
| 13 | L | Frontal_Inf_Tri_L    | -46 | 30 | 14  | 2529 |
| 14 | R | Frontal_Inf_Tri_R    | 50  | 30 | 14  | 2151 |
| 15 | L | Frontal_Inf_Orb_L    | -36 | 31 | -12 | 1690 |
| 16 | R | Frontal_Inf_Orb_R    | 41  | 32 | -12 | 1707 |
| 17 | L | Rolandic_Oper_L      | -47 | -8 | 14  | 990  |
| 18 | R | Rolandic_Oper_R      | 53  | -6 | 15  | 1331 |
| 19 | L | Supp_Motor_Area_L    | -5  | 5  | 61  | 2147 |
| 20 | R | Supp_Motor_Area_R    | 9   | 0  | 62  | 2371 |
| 21 | L | Olfactory_L          | -8  | 15 | -11 | 280  |
| 22 | R | Olfactory_R          | 10  | 16 | -11 | 289  |
| 23 | L | Frontal_Sup_Medial_L | -5  | 49 | 31  | 2992 |
| 24 | R | Frontal_Sup_Medial_R | 9   | 51 | 30  | 2134 |
| 25 | L | Frontal_Med_Orb_L    | -5  | 54 | -7  | 719  |
| 26 | R | Frontal_Med_Orb_R    | 8   | 52 | -7  | 856  |

|    |   |                   |     |     |     |      |
|----|---|-------------------|-----|-----|-----|------|
| 27 | L | Rectus_L          | -5  | 37  | -18 | 852  |
| 28 | R | Rectus_R          | 8   | 36  | -18 | 745  |
| 29 | L | Insula_L          | -35 | 7   | 3   | 1858 |
| 30 | R | Insula_R          | 39  | 6   | 2   | 1770 |
| 31 | L | Cingulum_Ant_L    | -4  | 35  | 14  | 1400 |
| 32 | R | Cingulum_Ant_R    | 8   | 37  | 16  | 1313 |
| 33 | L | Cingulum_Mid_L    | -5  | -15 | 42  | 1941 |
| 34 | R | Cingulum_Mid_R    | 8   | -9  | 40  | 2203 |
| 35 | L | Cingulum_Post_L   | -5  | -43 | 25  | 463  |
| 36 | R | Cingulum_Post_R   | 7   | -42 | 22  | 335  |
| 37 | L | Hippocampus_L     | -25 | -21 | -10 | 932  |
| 38 | R | Hippocampus_R     | 29  | -20 | -10 | 946  |
| 39 | L | ParaHippocampal_L | -21 | -16 | -21 | 978  |
| 40 | R | ParaHippocampal_R | 25  | -15 | -20 | 1132 |
| 41 | L | Amygdala_L        | -23 | -1  | -17 | 220  |
| 42 | R | Amygdala_R        | 27  | 1   | -18 | 248  |
| 43 | L | Calcarine_L       | -7  | -79 | 6   | 2258 |
| 44 | R | Calcarine_R       | 16  | -73 | 9   | 1861 |
| 45 | L | Cuneus_L          | -6  | -80 | 27  | 1526 |
| 46 | R | Cuneus_R          | 14  | -79 | 28  | 1424 |
| 47 | L | Lingual_L         | -15 | -68 | -5  | 2095 |
| 48 | R | Lingual_R         | 16  | -67 | -4  | 2300 |
| 49 | L | Occipital_Sup_L   | -17 | -84 | 28  | 1366 |
| 50 | R | Occipital_Sup_R   | 24  | -81 | 31  | 1413 |
| 51 | L | Occipital_Mid_L   | -32 | -81 | 16  | 3270 |

|    |   |                      |     |     |     |      |
|----|---|----------------------|-----|-----|-----|------|
| 52 | R | Occipital_Mid_R      | 37  | -80 | 19  | 2098 |
| 53 | L | Occipital_Inf_L      | -36 | -78 | -8  | 941  |
| 54 | R | Occipital_Inf_R      | 38  | -82 | -8  | 989  |
| 55 | L | Fusiform_L           | -31 | -40 | -20 | 2310 |
| 56 | R | Fusiform_R           | 34  | -39 | -20 | 2518 |
| 57 | L | Postcentral_L        | -42 | -23 | 49  | 3892 |
| 58 | R | Postcentral_R        | 41  | -25 | 53  | 3823 |
| 59 | L | Parietal_Sup_L       | -23 | -60 | 59  | 2065 |
| 60 | R | Parietal_Sup_R       | 26  | -59 | 62  | 2222 |
| 61 | L | Parietal_Inf_L       | -43 | -46 | 47  | 2447 |
| 62 | R | Parietal_Inf_R       | 46  | -46 | 50  | 1345 |
| 63 | L | SupraMarginal_L      | -56 | -34 | 30  | 1256 |
| 64 | R | SupraMarginal_R      | 58  | -32 | 34  | 1974 |
| 65 | L | Angular_L            | -44 | -61 | 36  | 1173 |
| 66 | R | Angular_R            | 46  | -60 | 39  | 1752 |
| 67 | L | Precuneus_L          | -7  | -56 | 48  | 3528 |
| 68 | R | Precuneus_R          | 10  | -56 | 44  | 3265 |
| 69 | L | Paracentral_Lobule_L | -8  | -25 | 70  | 1349 |
| 70 | R | Paracentral_Lobule_R | 7   | -32 | 68  | 836  |
| 71 | L | Caudate_L            | -11 | 11  | 9   | 962  |
| 72 | R | Caudate_R            | 15  | 12  | 9   | 994  |
| 73 | L | Putamen_L            | -24 | 4   | 2   | 1009 |
| 74 | R | Putamen_R            | 28  | 5   | 2   | 1064 |
| 75 | L | Pallidum_L           | -18 | 0   | 0   | 293  |
| 76 | R | Pallidum_R           | 21  | 0   | 0   | 280  |



|     |   |                     |     |     |     |      |
|-----|---|---------------------|-----|-----|-----|------|
| 77  | L | Thalamus_L          | -11 | -18 | 8   | 1100 |
| 78  | R | Thalamus_R          | 13  | -18 | 8   | 1057 |
| 79  | L | Heschl_L            | -42 | -19 | 10  | 225  |
| 80  | R | Heschl_R            | 46  | -17 | 10  | 249  |
| 81  | L | Temporal_Sup_L      | -53 | -21 | 7   | 2296 |
| 82  | R | Temporal_Sup_R      | 58  | -22 | 7   | 3141 |
| 83  | L | Temporal_Pole_Sup_L | -40 | 15  | -20 | 1285 |
| 84  | R | Temporal_Pole_Sup_R | 48  | 15  | -17 | 1338 |
| 85  | L | Temporal_Mid_L      | -56 | -34 | -2  | 4942 |
| 86  | R | Temporal_Mid_R      | 57  | -37 | -1  | 4409 |
| 87  | L | Temporal_Pole_Mid_L | -36 | 15  | -34 | 755  |
| 88  | R | Temporal_Pole_Mid_R | 44  | 15  | -32 | 1187 |
| 89  | L | Temporal_Inf_L      | -50 | -28 | -23 | 3200 |
| 90  | R | Temporal_Inf_R      | 54  | -31 | -22 | 3557 |
| 91  | L | Cerebellum_Crus1_L  | -35 | -67 | -29 | 2603 |
| 92  | R | Cerebellum_Crus1_R  | 38  | -67 | -30 | 2648 |
| 93  | L | Cerebellum_Crus2_L  | -28 | -73 | -38 | 1894 |
| 94  | R | Cerebellum_Crus2_R  | 33  | -69 | -40 | 2117 |
| 95  | L | Cerebellum_3_L      | -8  | -37 | -19 | 136  |
| 96  | R | Cerebellum_3_R      | 13  | -34 | -19 | 207  |
| 97  | L | Cerebellum_4_5_L    | -14 | -43 | -17 | 1125 |
| 98  | R | Cerebellum_4_5_R    | 18  | -43 | -18 | 861  |
| 99  | L | Cerebellum_6_L      | -22 | -59 | -22 | 1694 |
| 100 | R | Cerebellum_6_R      | 26  | -58 | -24 | 1795 |
| 101 | L | Cerebellum_7b_L     | -31 | -60 | -45 | 585  |

|     |         |                 |     |     |     |      |
|-----|---------|-----------------|-----|-----|-----|------|
| 102 | R       | Cerebellum_7b_R | 34  | -63 | -48 | 534  |
| 103 | L       | Cerebellum_8_L  | -25 | -55 | -48 | 1887 |
| 104 | R       | Cerebellum_8_R  | 26  | -56 | -49 | 2308 |
| 105 | L       | Cerebellum_9_L  | -10 | -49 | -46 | 869  |
| 106 | R       | Cerebellum_9_R  | 10  | -49 | -46 | 809  |
| 107 | L       | Cerebellum_10_L | -22 | -34 | -42 | 144  |
| 108 | R       | Cerebellum_10_R | 27  | -34 | -41 | 159  |
| 109 | midline | Vermis_1_2      | 2   | -39 | -20 | 53   |
| 110 | midline | Vermis_3        | 2   | -40 | -11 | 228  |
| 111 | midline | Vermis_4_5      | 2   | -52 | -6  | 665  |
| 112 | midline | Vermis_6        | 2   | -67 | -15 | 371  |
| 113 | midline | Vermis_7        | 2   | -72 | -25 | 194  |
| 114 | midline | Vermis_8        | 2   | -64 | -34 | 243  |
| 115 | midline | Vermis_9        | 2   | -55 | -35 | 174  |
| 116 | midline | Vermis_10       | 1   | -46 | -32 | 112  |

**Table S4.** Demographics. Demographic and questionnaire items were significantly different between groups by ANOVA followed by Bonferroni correction for multiple comparisons ( $p < 0.05$ ): \* CFS vs. control and GWI; \*\* CFS vs. GWI; \*\*\* control vs. CFS and GWI; § all 3 groups significantly different from each other; GWI vs. control and CFS (mean  $\pm$  SD).

|                                           | Control           | CFS               | GWI             |
|-------------------------------------------|-------------------|-------------------|-----------------|
| N                                         | 30                | 38                | 75              |
| Age                                       | 45.9 $\pm$ 7.4    | 47.7 $\pm$ 13.0   | 47.8 $\pm$ 10.8 |
| Male                                      | 63.3%             | 29.0% *           | 78.7%           |
| Body mass index                           | 28.5 $\pm$ 4.5    | 26.2 $\pm$ 5.4 ** | 29.4 $\pm$ 5.5  |
| <b>CFS Symptom Severity Questionnaire</b> |                   |                   |                 |
| fatigue                                   | 1.3 $\pm$ 1.2 *** | 3.4 $\pm$ 0.8     | 3.5 $\pm$ 0.7   |
| memory                                    | 1.2 $\pm$ 1.2 *** | 2.9 $\pm$ 0.9     | 3.1 $\pm$ 0.8   |
| sore throat                               | 0.3 $\pm$ 0.7 *** | 1.0 $\pm$ 1.0     | 1.4 $\pm$ 1.2   |
| lymph nodes                               | 0.1 $\pm$ 0.4     | 1.0 $\pm$ 1.1 §   | 1.5 $\pm$ 1.3   |
| muscle pain                               | 0.6 $\pm$ 1.0     | 2.5 $\pm$ 1.3 §   | 3.2 $\pm$ 0.9   |
| joint pain                                | 0.8 $\pm$ 1.0     | 1.8 $\pm$ 1.5 §   | 3.2 $\pm$ 1.0   |
| headache                                  | 1.0 $\pm$ 1.2     | 2.0 $\pm$ 1.3 §   | 2.7 $\pm$ 1.2   |
| sleep                                     | 1.7 $\pm$ 1.4 *** | 3.2 $\pm$ 0.9     | 3.5 $\pm$ 0.8   |

|                              |                 |               |             |
|------------------------------|-----------------|---------------|-------------|
| exertional exhaustion        | 0.6 ± 1.1 ***   | 3.5 ± 0.8     | 3.4 ± 0.9   |
| <b>SF-36 Quality of Life</b> |                 |               |             |
| physical functioning         | 84.7 ± 24.4 *** | 45.9 ± 26.6   | 45.6 ± 23.2 |
| role physical                | 79.3 ± 37.2 *** | 9.5 ± 25.2    | 7.9 ± 22.4  |
| bodily pain                  | 82.3 ± 20.2     | 46.6 ± 27.0 § | 28.1 ± 17.5 |
| general health               | 68.9 ± 22.6 *** | 34.7 ± 23.7   | 25.8 ± 18.5 |
| vitality                     | 59.8 ± 21.0 *** | 18.9 ± 15.9   | 16.8 ± 15.0 |
| social functioning           | 79.3 ± 25.3 *** | 32.4 ± 27.4   | 29.8 ± 22.7 |
| role emotional               | 86.2 ± 31.5     | 69.4 ± 44.7   | 29.2 ± 38.1 |
| mental health                | 73.9 ± 17.0     | 67.7 ± 17.0   | 53.9 ± 22.1 |

**Table S5.** Sensitivity, Specificity, False Discovery Rate (FDR), PPV, and NPV for the highest performing overall model. Although individually selected regions may have performed higher on different regions, this model produced the best overall accuracy across all models and one of the highest accuracies (82% for Logistic Regression and Decision Tree) on the validation set overall

|             | Nearest<br>Neighbors | Linear<br>SVM | Decision<br>Tree | Random<br>Forest | AdaBoost | Naive<br>Bayes | QDA  | Logistic<br>Regression | Neural<br>Net |
|-------------|----------------------|---------------|------------------|------------------|----------|----------------|------|------------------------|---------------|
| Day 1       |                      |               |                  |                  |          |                |      |                        |               |
| Sensitivity | 24%                  | 55%           | 66%              | 39%              | 47%      | 68%            | 45%  | 55%                    | 55%           |
| Specificity | 93%                  | 89%           | 90%              | 99%              | 96%      | 58%            | 100% | 86%                    | 86%           |
| FDR         | 40%                  | 30%           | 24%              | 6%               | 14%      | 57%            | 0%   | 34%                    | 34%           |
| PPV         | 60%                  | 70%           | 76%              | 60%              | 60%      | 60%            | 60%  | 60%                    | 60%           |
| NPV         | 72%                  | 81%           | 85%              | 72%              | 72%      | 72%            | 72%  | 72%                    | 72%           |
| Day 2       |                      |               |                  |                  |          |                |      |                        |               |
| Sensitivity | 34%                  | 58%           | 63%              | 37%              | 53%      | 39%            | 45%  | 58%                    | 58%           |
| Specificity | 89%                  | 86%           | 86%              | 95%              | 90%      | 89%            | 100% | 86%                    | 86%           |
| FDR         | 41%                  | 33%           | 31%              | 22%              | 29%      | 38%            | 0%   | 33%                    | 33%           |
| PPV         | 59%                  | 67%           | 69%              | 78%              | 71%      | 63%            | 100% | 67%                    | 67%           |
| NPV         | 74%                  | 81%           | 83%              | 76%              | 80%      | 75%            | 79%  | 81%                    | 81%           |
